# Supplementary material for: Limitations and Recommendations for Advancing the Occupational Therapy Workforce Research Worldwide: Scoping Review and Content Analysis of the Literature
Source: MDPI journal article supplement (doi:10.3390/ijerph19127327), 2022-06-15
Supplement: s1 [file s1]

## Detailed search strategies for each database

### PubMed

("Health Workforce"[Mesh] OR "Professional Autonomy"[Mesh] OR ("Professional Competence"[Major] AND "Credentialing"[Mesh]) OR "Staff Development"[Major] OR ("Education, Continuing"[Major] OR "Inservice Training"[Major]) AND "Credentialing"[MeSH]) OR ("Personnel Management"[Major] AND "Health Personnel"[Major]) OR "Delegation, Professional"[Mesh] OR "Foreign Professional Personnel"[Mesh] OR "Personnel Selection"[Mesh] OR "Credentialing"[MeSH] OR "Burnout, Professional"[Major] OR "Workforce" OR "Human Resources") AND ("Occupational Therapists"[Mesh] OR "Occupational Therapy Department, Hospital"[Major] OR "Occupational Therapy"[Mesh] OR ("Occupational Therap\*" NOT "Occupational Therapy"[AD])) AND ("Study Characteristics" [Publication Type] OR "Data Collection"[Mesh] OR "Guideline" [Publication Type] OR "Empirical Research"[MeSH] OR "Epidemiologic Methods"[MeSH] OR (Review[ptyp] AND systematic[tw] AND systematic[sb]) OR "systematic review"[Publication Type] OR "Cochrane Database Syst Rev"[Journal] OR ("systematic review"[ti] OR "scoping review"[ti] OR "realist review"[ti]))

### Web of Science – Core Collection

(TS="Occupational Therapist" OR TS="Occupational Therapists" OR TS="Occupational Therapy") AND (TS="Workforce" OR TS="Human Resources" OR TS="Credential" OR TS="Continuing Education" OR TS="Continuous Education" OR TS="Burnout" OR TS="Professional Autonomy" OR TS="Professional Competence" OR TS="Employment" OR TS="Recruitment" OR TS="Retention")

Refined by: DOCUMENT TYPES: ( ARTICLE OR REVIEW OR EARLY ACCESS ) AND  
WEB OF SCIENCE CATEGORIES: ( PUBLIC ENVIRONMENTAL OCCUPATIONAL  
HEALTH OR HEALTH CARE SCIENCES SERVICES OR HEALTH POLICY SERVICES  
OR MULTIDISCIPLINARY SCIENCES OR MANAGEMENT OR MEDICAL

INFORMATICS OR SOCIAL SCIENCES BIOMEDICAL OR SOCIAL SCIENCES  
INTERDISCIPLINARY OR ENVIRONMENTAL SCIENCES OR SOCIAL ISSUES )

Timespan: All years. Indexes: SCI-EXPANDED, SSCI, A&HCI, CPCI-S, CPCI-SSH, BKCI-S, BKCI-SSH, ESCI.

**CINAHL** (through EBSCO host)

MW ("occupational therapy" or "occupational therapist" or "occupational therapists") AND  
MW ("Workforce" or "Human Resources" or "Credential" or "Continuing Education" or  
"Continuous Education" or "Burnout" or "Professional Autonomy" or "Professional  
Competence" or "job characteristics" or "recruitment" or "retention") AND PT (Journal  
article or Systematic review or Research or Case study)

### **Expanders**

- Apply related words
- Apply equivalent subjects

### **Source Types**

- Academic Journals

### **Subject: Major Heading**

- occupational therapists
- occupational therapy
- burnout, professional
- personnel recruitment
- professional role
- personnel retention
- job characteristics
- job satisfaction
- professional development
- professional practice
- workforce
- education, continuing
- new graduates

- professional autonomy
- personnel shortage
- health personnel
- occupational therapy assistants.
- employment
- professionalism

### **PDQ – Evidence for Informed Health Policymaking,**

("occupational therapy" or "occupational therapist" or "occupational therapists") AND  
 (("Workforce" or "Human Resources" or "Credential" or "Continuing Education" or  
 "Continuous Education" or "Burnout" or "Professional Autonomy" or "Professional  
 Competence" or "job characteristics" or "recruitment" or "retention"))

### **OTseeker**

("occupational therapy" or "occupational therapist" or "occupational therapists") AND  
 (("Workforce" or "Human Resources" or "personnel" or "worker" or "staff" or "Credential"  
 or "licens\*" "Continuing Education" or "Continuous Education" or "Burnout" or  
 "Professional Autonomy" or "Professional Competence" OR "Professional Competence" or  
 "job" or "workload" or "recruitment" or "retention"))

### **Scopus**

( TITLE-ABS-KEY ( "Occupational Therapist" ) OR TITLE-ABS-KEY ( "Occupational  
 Therapists" ) OR TITLE-ABS-KEY ( " Occupational Therapy" ) ) AND ( TITLE-ABS-  
 KEY ( "Workforce" ) OR TITLE-ABS-KEY ( "Human Resources" ) OR TITLE-ABS-

KEY ( "Credential" ) OR TITLE-ABS-KEY ( "Continuing Education" ) OR TITLE-ABS-  
 KEY ( "Continuous Education" ) OR TITLE-ABS-KEY ( "Burnout" ) OR TITLE-ABS-  
 KEY ( "Professional Autonomy" ) OR TITLE-ABS-KEY ( "Professional Competence" )  
 OR TITLE-ABS-KEY ( "job characteristics" ) OR TITLE-ABS-KEY ( "recruitment" ) OR  
 TITLE-ABS-KEY ( "retention" ) ) AND ( LIMIT-TO ( DOCTYPE , "ar" ) OR LIMIT-TO  
 ( DOCTYPE , "re" ) ) AND ( LIMIT-TO ( SUBJAREA , "HEAL" ) OR LIMIT-TO ( SUBJAREA , "SOCI" ) OR LIMIT-TO ( SUBJAREA , "BUSI" ) ) AND ( LIMIT-TO ( SRCTYPE , "j" ) ) AND ( EXCLUDE ( EXACTKEYWORD , "Education" ) ) AND ( LIMIT-TO ( EXACTKEYWORD , "Occupational Therapy" ) OR LIMIT-TO ( EXACTKEYWORD , "Occupational Therapist" ) OR LIMIT-TO ( EXACTKEYWORD , "Professional Competence" ) OR LIMIT-TO ( EXACTKEYWORD , "Continuing Education" ) OR LIMIT-TO ( EXACTKEYWORD , "Professional Practice" ) OR LIMIT-TO ( EXACTKEYWORD , "Job Satisfaction" ) OR LIMIT-TO ( EXACTKEYWORD , "Personnel Management" ) OR LIMIT-TO ( EXACTKEYWORD , "Health Care Delivery" ) OR LIMIT-TO ( EXACTKEYWORD , "Employment" ) OR LIMIT-TO ( EXACTKEYWORD , "Health Care Personnel" ) OR LIMIT-TO ( EXACTKEYWORD , "Occupational Therapists" ) OR LIMIT-TO ( EXACTKEYWORD , "Professional Standard" ) OR LIMIT-TO ( EXACTKEYWORD , "Professional Development" ) OR LIMIT-TO ( EXACTKEYWORD , "Health Care Quality" ) OR LIMIT-TO ( EXACTKEYWORD , "Professional Role" ) OR LIMIT-TO ( EXACTKEYWORD , "Burnout, Professional" ) OR LIMIT-TO ( EXACTKEYWORD , "Education, Continuing" ) OR LIMIT-TO ( EXACTKEYWORD , "Job Performance" ) OR LIMIT-TO ( EXACTKEYWORD , "Workforce" ) OR LIMIT-TO ( EXACTKEYWORD , "Health Care Policy" ) OR LIMIT-TO ( EXACTKEYWORD , "Health Personnel" ) OR LIMIT-TO ( EXACTKEYWORD , "Leadership" ) OR LIMIT-TO ( EXACTKEYWORD , "Task Performance" ) OR LIMIT-TO ( EXACTKEYWORD , "Workload" ) OR LIMIT-TO ( EXACTKEYWORD , "Health Care Organization" ) OR LIMIT-TO ( EXACTKEYWORD , "Manager" ) OR LIMIT-TO ( EXACTKEYWORD , "Accreditation" ) OR LIMIT-TO ( EXACTKEYWORD , "Health Services Research" ) OR LIMIT-TO ( EXACTKEYWORD , "Management" ) OR LIMIT-TO ( EXACTKEYWORD , "Professional Autonomy" ) OR LIMIT-TO ( EXACTKEYWORD , "Retention" ) OR LIMIT-TO ( EXACTKEYWORD , "Rural Health Services" ) OR LIMIT-TO ( EXACTKEYWORD , "Delivery Of Health Care" ) OR LIMIT-TO ( EXACTKEYWORD , "Health Care" ) OR LIMIT-TO ( EXACTKEYWORD , "Health Care Planning" ) ) AND ( EXCLUDE ( SUBJAREA ,

"MEDI" ) OR EXCLUDE ( SUBJAREA , "NURS" ) OR EXCLUDE ( SUBJAREA ,  
 "PSYC" ) OR EXCLUDE ( SUBJAREA , "ENGI" ) OR EXCLUDE ( SUBJAREA ,  
 "ARTS" ) OR EXCLUDE ( SUBJAREA , "NEUR" ) OR EXCLUDE ( SUBJAREA ,  
 "PHAR" ) OR EXCLUDE ( SUBJAREA , "BIOC" ) OR EXCLUDE ( SUBJAREA ,  
 "ENER" ) OR EXCLUDE ( SUBJAREA , "ENVI" ) ) AND ( EXCLUDE (   
 EXACTKEYWORD , "Patient Care" ) OR EXCLUDE ( EXACTKEYWORD , "Medical  
 Research" ) OR EXCLUDE ( EXACTKEYWORD , "Mental Health Service" ) OR  
 EXCLUDE ( EXACTKEYWORD , "Normal Human" ) OR EXCLUDE (   
 EXACTKEYWORD , "Occupation" ) OR EXCLUDE ( EXACTKEYWORD , "Daily Life  
 Activity" ) OR EXCLUDE ( EXACTKEYWORD , "Evidence Based Practice" ) OR  
 EXCLUDE ( EXACTKEYWORD , "Major Clinical Study" ) OR EXCLUDE (   
 EXACTKEYWORD , "Stroke" ) OR EXCLUDE ( EXACTKEYWORD , "Vocational  
 Education" ) OR EXCLUDE ( EXACTKEYWORD , "Follow Up" ) OR EXCLUDE (   
 EXACTKEYWORD , "Medical Literature" ) OR EXCLUDE ( EXACTKEYWORD ,  
 "Social Support" ) OR EXCLUDE ( EXACTKEYWORD , "Therapy" ) OR EXCLUDE (   
 EXACTKEYWORD , "Adaptive Behavior" ) OR EXCLUDE ( EXACTKEYWORD ,  
 "Clinical Article" ) OR EXCLUDE ( EXACTKEYWORD , "Motor Performance" ) OR  
 EXCLUDE ( EXACTKEYWORD , "Treatment Outcome" ) OR EXCLUDE (   
 EXACTKEYWORD , "Activities Of Daily Living" ) OR EXCLUDE (   
 EXACTKEYWORD , "Disabled Person" ) OR EXCLUDE ( EXACTKEYWORD ,  
 "Disabled Persons" ) )
